# Supplementary material
Source: PubMed Central journal article supplement (PMC10595061)
Supplement: jcm.00739-23-s0001.pdf [file jcm.00739-23-s0001.pdf]

Supplemental Table 1. Calculation of Method Comparison Agreement and Error Categories and Acceptable Criteria

| Agreement or Error Category | Calculation Formula           | Calculation Formula Terms                                                                                                                                                                                            | Acceptance Criteria <sup>1</sup> |
|-----------------------------|-------------------------------|----------------------------------------------------------------------------------------------------------------------------------------------------------------------------------------------------------------------|----------------------------------|
| Category Agreement (CA)     | $N_{CA}/NT \times 100$        | $N_{CA}$ – number of isolates with an AST Result with the same categorical interpretation as reference method<br>NT – number of isolates tested                                                                      | $\geq 90\%$ CA                   |
| Essential Agreement (EA)    | $N_{EA}/NT \times 100$        | $N_{EA}$ – number of isolates with the same or within one doubling dilution MIC value as the reference method<br>NT – number of isolates with same or within one doubling dilution MIC value as the reference method | $\geq 90\%$ EA                   |
| Minor Error (mE)            | $N_{ME}/NT \times 100$        | $N_{ME}$ – number of isolates having minor errors<br>NT- number of isolates tested                                                                                                                                   | $\leq 10\%$ mE                   |
| Major Error (ME)            | $N_{ME}/N_{RefS} \times 100$  | $N_{ME}$ – number of isolates that yielded false-resistant results<br>$N_{RefS}$ – number of isolates susceptible by the reference method                                                                            | $< 3\%$ ME                       |
| Very Major Error (VME)      | $N_{VME}/N_{RefR} \times 100$ | $N_{VME}$ – number of isolates that tested false-susceptible<br>$N_{RefR}$ – number of isolates resistant by the reference method                                                                                    | $< 3\%$ VME <sup>2</sup>         |

<sup>1</sup> from reference (1, 2)

<sup>2</sup>FDA uses VME rate acceptance criteria of 1.5%

Supplemental Table 2. Acceptance performance rates for cASTs, by the error-rate bound method, for antimicrobials with an intermediate category

| Reference (BMD) MIC range for isolates to include in denominator of error calculations |                                               | Acceptable Error Rates |      |      |
|----------------------------------------------------------------------------------------|-----------------------------------------------|------------------------|------|------|
| 1-dilution intermediate range                                                          | 2-dilution intermediate range                 | VME                    | ME   | mE   |
| $\geq I + 2$                                                                           | $\geq I_{\text{high}} + 2$                    | < 2%                   | ND   | <5%  |
| I+1 to I-1                                                                             | $I_{\text{high}} + 1$ to $I_{\text{low}} - 1$ | <40%                   | <10% | <10% |
| $\leq I - 2$                                                                           | $\leq I_{\text{low}} - 2$                     | ND                     | <2%  | <5%  |

MIC, minimal inhibitory concentration; mE, minor error; ME, major error; VME, very major error; I, intermediate MIC value;  $I_{\text{high}}$ , high end of the MIC range for the intermediate category;  $I_{\text{low}}$ , low end of the MIC range for the intermediate category; ND, not determined

Supplemental Table 3. Acceptance performance rates for ASTs, by the error-rate bound method, when no intermediate category exists.

| Reference (BMD) MIC range for isolates to include in denominator of error calculations | Acceptable Error Rates |      |      |
|----------------------------------------------------------------------------------------|------------------------|------|------|
|                                                                                        | VME                    | ME   | mE   |
| $\geq R + 1$                                                                           | < 2%                   | ND   | 5%   |
| $R + S$                                                                                | < 40%                  | <10% | <10% |
| $\leq S - 1$                                                                           | ND                     | <2%  | <5%  |

MIC, minimal inhibitory concentration; mE, minor error; ME, major error; VME, very major error; R, resistant MIC value; S, susceptible MIC value; ND, not determined

Supplemental Table 4. Hypothetical examples of arbitrating discrepancies between cAST and BMD, for an antimicrobial with the following breakpoints:  $\leq 0.25$   $\mu\text{g/mL}$  (S),  $0.5$   $\mu\text{g/mL}$  (I),  $\geq 1$   $\mu\text{g/mL}$  (R)

|                    | MIC ( $\mu\text{g/mL}$ ) |           |           |           | Final arbitrated result | Error / rationale                                  |
|--------------------|--------------------------|-----------|-----------|-----------|-------------------------|----------------------------------------------------|
|                    | Original result          | Repeat #1 | Repeat #2 | Repeat #3 |                         |                                                    |
| <b>Example #1</b>  |                          |           |           |           |                         |                                                    |
| cAST               | 1 (R)                    | 0.12 (S)  | -         |           | 0.12 (S)                | none                                               |
| BMD*               | 0.06 (S)                 | 0.06 (S)  | -         |           | 0.06 (S)                | cAST MIC corrected on repeat test                  |
| <b>Example #2</b>  |                          |           |           |           |                         |                                                    |
| cAST               | 1 (R)                    | 0.12 (S)  | 0.5 (I)   |           | 0.5 (I)                 | mE                                                 |
| BMD*               | 0.06 (S)                 | 0.06 (S)  | 0.06 (S)  |           | 0.06 (S)                | Final cAST MIC within 1 dilution of initial result |
| <b>Example # 3</b> |                          |           |           |           |                         |                                                    |
| cAST               | 0.06 (S)                 | 0.06 (S)  | 0.06 (S)  |           | 0.06 (S)                | none                                               |
| BMD*               | 1 (R)                    | 0.06 (S)  | 0.5 (I)   | 1 (R)     | 0.25 (S)                | Final BMD MIC = mode of 3 results                  |
| <b>Example #4</b>  |                          |           |           |           |                         |                                                    |
| cAST               | 1 (R)                    | 0.12 (S)  | 32 (R)    |           | Inconclusive            | -                                                  |
| BMD*               | 0.06 (S)                 | 0.06 (S)  | 0.06 (S)  |           | 0.06                    | Check isolate further for purity, ID, etc.         |
| <b>Example #5</b>  |                          |           |           |           |                         |                                                    |
| cAST               | 1 (R)                    | 1 (R)     | 0.5 (I)   |           | 1 (R)                   | ME                                                 |

|      |          |          |          |          |                                          |
|------|----------|----------|----------|----------|------------------------------------------|
| BMD* | 0.06 (S) | 0.06 (S) | 0.06 (S) | 0.06 (S) | Final cAST MIC<br>= mode of 3<br>results |
|------|----------|----------|----------|----------|------------------------------------------|

---

\*DD or AD when one of these methods is the essential reference method for agent evaluated

mE, minor error; ME, major error; cAST, commercial antimicrobial susceptibility test; BMD, broth microdilution; MIC, minimum inhibitory concentration; S, susceptible; I, intermediate; R, resistant
